# Supplementary material for: Using sulfur bridge oxidation to control electronic coupling and photochemistry in covalent anthracene dimers
Source: Royal Society of Chemistry journal article supplement (doi:10.1039/c8sc05598j), 2019-01-01
Supplement: c8sc05598j1.pdf [file c8sc05598j1.pdf]

## Supplementary Information

### Using Sulfur Bridge Oxidation to Control Electronic Coupling and Photochemistry in Covalent Anthracene Dimers

Chad D. Cruz<sup>1</sup>, Jennifer Yuan<sup>2</sup>, Clàudia Climent<sup>3</sup>, Nathan Tierce<sup>1</sup>, Peter R. Christensen<sup>2</sup>, Eric L. Chronister<sup>1</sup>, David Casanova<sup>4\*</sup>, Michael O. Wolf<sup>2\*</sup>, Christopher J. Bardeen<sup>1\*</sup>

<sup>1</sup> Department of Chemistry, University of California Riverside, 501 Big Springs Road, Riverside, California 92521, United States

<sup>2</sup> Department of Chemistry, University of British Columbia, 2036 Main Mall, Vancouver, BC, Canada V6T 1Z1

<sup>3</sup> Departamento de Física Teórica de la Materia Condensada, Universidad Autónoma de Madrid, E-28049 Madrid, Spain

<sup>4</sup> Donostia International Physics Center (DIPC), Paseo Manuel de Lardiazabal 4, 20018 Donostia, Euskadi, Spain; IKERBASQUE, Basque Foundation for Science, 48013 Bilbao, Euskadi, Spain

#### Synthetic Details

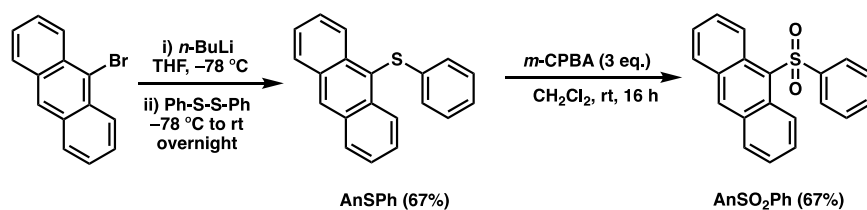

**Scheme S1.** Reaction conditions for the synthesis of model compounds (AnSO<sub>n</sub>Ph).

9-bromoanthracene was purchased from TCI and meta-chloroperoxybenzoic acid (mCPBA) was purchased from Sigma Aldrich. All other chemicals and solvents were purchased from Sigma Aldrich and used as received. Dry and degassed solvents were obtained from an Innovative Technology solvent purification system solvent purification system. All nuclear magnetic resonance (NMR) spectroscopy was performed on a Bruker 400 MHz spectrometer in CDCl<sub>3</sub>.

Infrared (IR) spectroscopy was performed on a Perkin-Elmer Frontier FT-IR spectrometer equipped with an attenuated total reflection (ATR) crystal.

**Anthracen-9-yl(phenyl)sulfane (AnSPh).** In an oven-dried Schlenk flask, 9-bromoanthracene (2.00 g, 7.78 mmol, 1.0 equiv.) was dissolved in dry THF (30 mL) and cooled to  $-78\text{ }^{\circ}\text{C}$ . To the reaction mixture, *n*-BuLi (1.6 M in hexanes, 5.84 mL, 9.32 mmol, 1.2 equiv.) was added dropwise at  $-78\text{ }^{\circ}\text{C}$  and allowed to stir for 1 h. In a separate vessel, diphenyl disulfide (1.69 g, 7.78 mmol, 1.0 equiv.) was dissolved in dry THF (10 mL) and added to the reaction in one portion at  $-78\text{ }^{\circ}\text{C}$ . The reaction was allowed to stir for 30 mins before being warmed to room temperature and left overnight. The reaction was quenched with water (50 mL) and extracted with  $\text{CH}_2\text{Cl}_2$  ( $3 \times 50\text{ mL}$ ). The organic layers were combined, washed with brine, dried over anhydrous  $\text{MgSO}_4$ , filtered and concentrated *in vacuo*. The residue was purified by flash column chromatography on silica gel using hexanes as the eluent to obtain **AnSPh**, a yellow solid. Yield: 1.48 g (67%).  $^1\text{H}$  NMR (400 MHz,  $\text{CDCl}_3$ ):  $\delta$  8.88 – 8.81 (m, 2H), 8.64 (s, 1H), 8.13 – 8.05 (m, 2H), 7.61 – 7.51 (m, 4H), 7.15 – 7.08 (m, 2H), 7.07 – 7.01 (m, 1H), 6.98 – 6.92 (m, 2H).  $^{13}\text{C}\{^1\text{H}\}$  NMR (101 MHz,  $\text{CDCl}_3$ ):  $\delta$  138.74, 135.02, 131.99, 130.23, 128.93, 128.87, 127.27, 126.86, 126.23, 125.59, 125.23, 124.88. HR-EI-MS:  $m/z$  calcd for  $\text{C}_{20}\text{H}_{14}\text{S}$  286.08162, found 286.08175.

**9-(Phenylsulfonyl)anthracene (AnSO<sub>2</sub>Ph).** In a RBF, (0.300 g, 1.05 mmol, 1.0 equiv.) was dissolved in  $\text{CH}_2\text{Cl}_2$  (15 mL) and *m*-CPBA (0.555 g, 3.17 mmol, 3.0 equiv.) was added in one portion. The reaction was allowed to stir at room temperature overnight and was monitored using TLC (approximately 16 h). The reaction was quenched with a solution of saturated  $\text{NaHCO}_3$  (aq) (30 mL) and extracted with  $\text{CH}_2\text{Cl}_2$  ( $3 \times 20\text{ mL}$ ). The organic layers were combined, washed with

brine, dried over anhydrous  $\text{MgSO}_4$ , filtered and concentrated *in vacuo*. The residue was purified by flash column chromatography on silica gel using  $\text{CH}_2\text{Cl}_2$ :hexanes (1:1) as the eluent to obtain **AnSO<sub>2</sub>Ph**, a yellow solid. Yield: 0.213 g (67%).  $^1\text{H}$  NMR (400 MHz,  $\text{CDCl}_3$ ):  $\delta$  9.44 (m, 2H), 8.78 (s, 1H), 8.11 – 8.05 (m, 2H), 8.01 – 7.96 (m, 2H), 7.67 (m, 2H), 7.59 – 7.49 (m, 3H), 7.48 – 7.42 (m, 2H).  $^{13}\text{C}\{^1\text{H}\}$  NMR (101 MHz,  $\text{CDCl}_3$ ):  $\delta$  144.25, 140.24, 139.08, 136.77, 132.73, 132.64, 131.29, 131.18, 129.46, 129.04, 128.95, 128.91, 128.83, 127.90, 127.22, 126.50, 126.08, 125.90, 125.46, 125.00. HR-EI-MS:  $m/z$  calcd 318.07145, found 318.07155. IR (neat):  $\tilde{\nu}$  ( $\sigma(\text{SO}_2)$ ) 1310, 1147  $\text{cm}^{-1}$ .

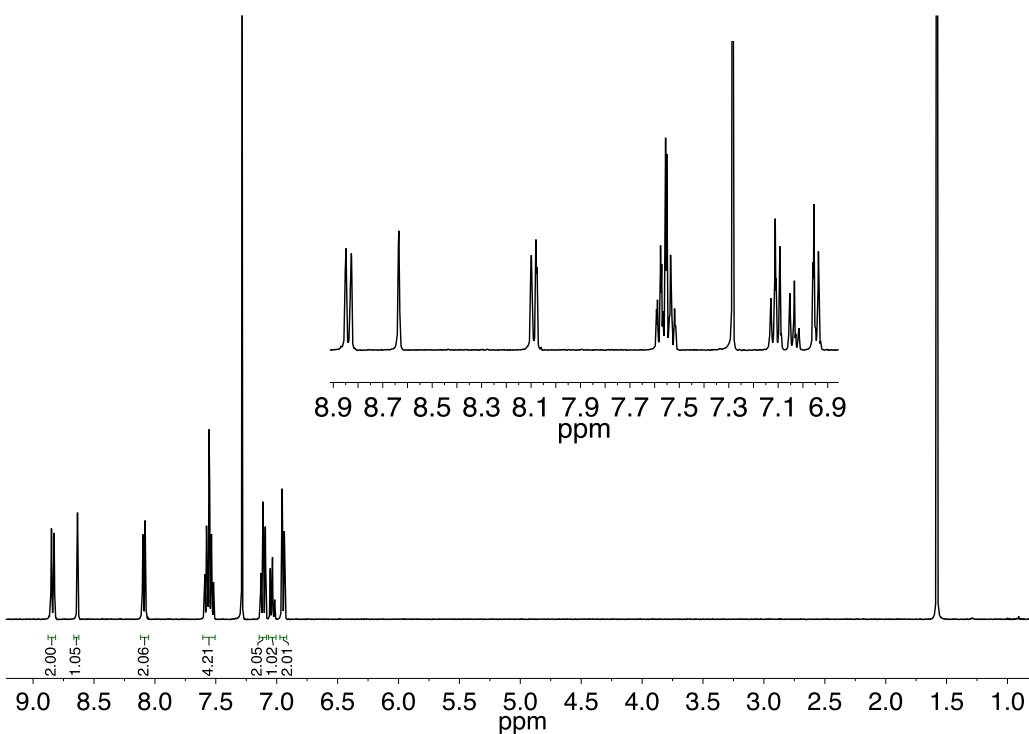

**Figure S1.**  $^1\text{H}$  NMR spectrum of **AnSPh** (400 MHz,  $\text{CDCl}_3$ ).

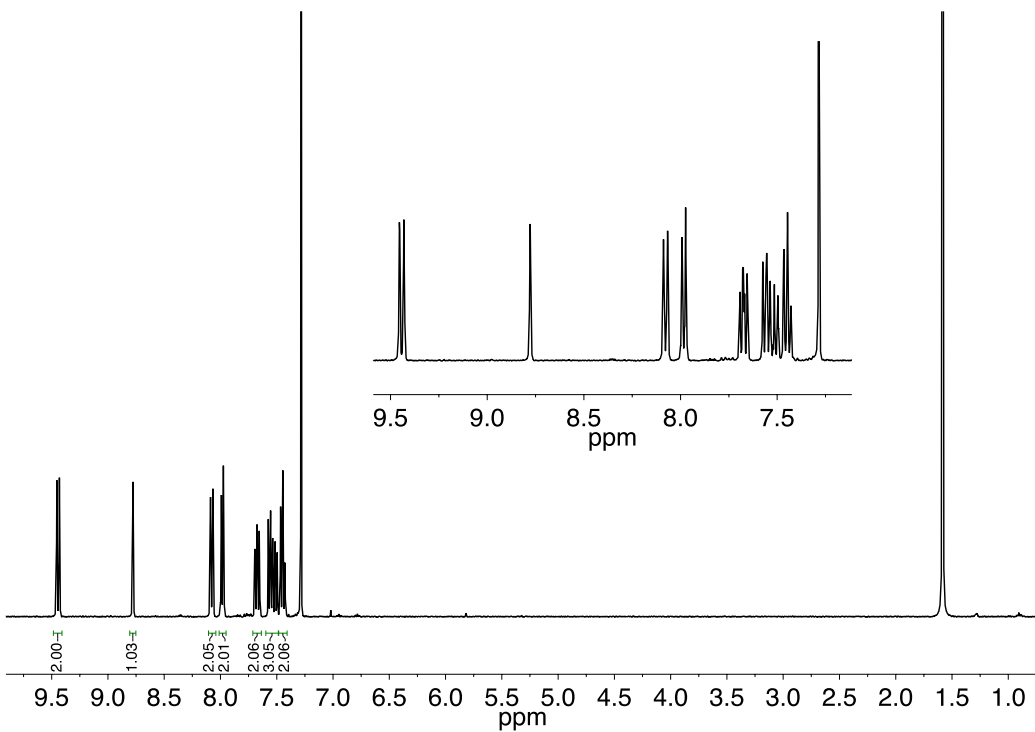

**Figure S2.**  $^1\text{H}$  NMR spectrum of **AnSO<sub>2</sub>Ph** (400 MHz,  $\text{CDCl}_3$ ).

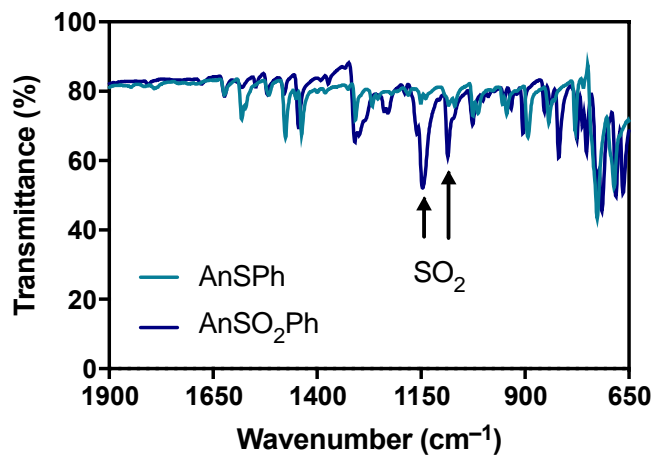

**Figure S3.** IR spectrum of **An-S-Ph** and **An-SO<sub>2</sub>-Ph**.

## Spectroscopic Details

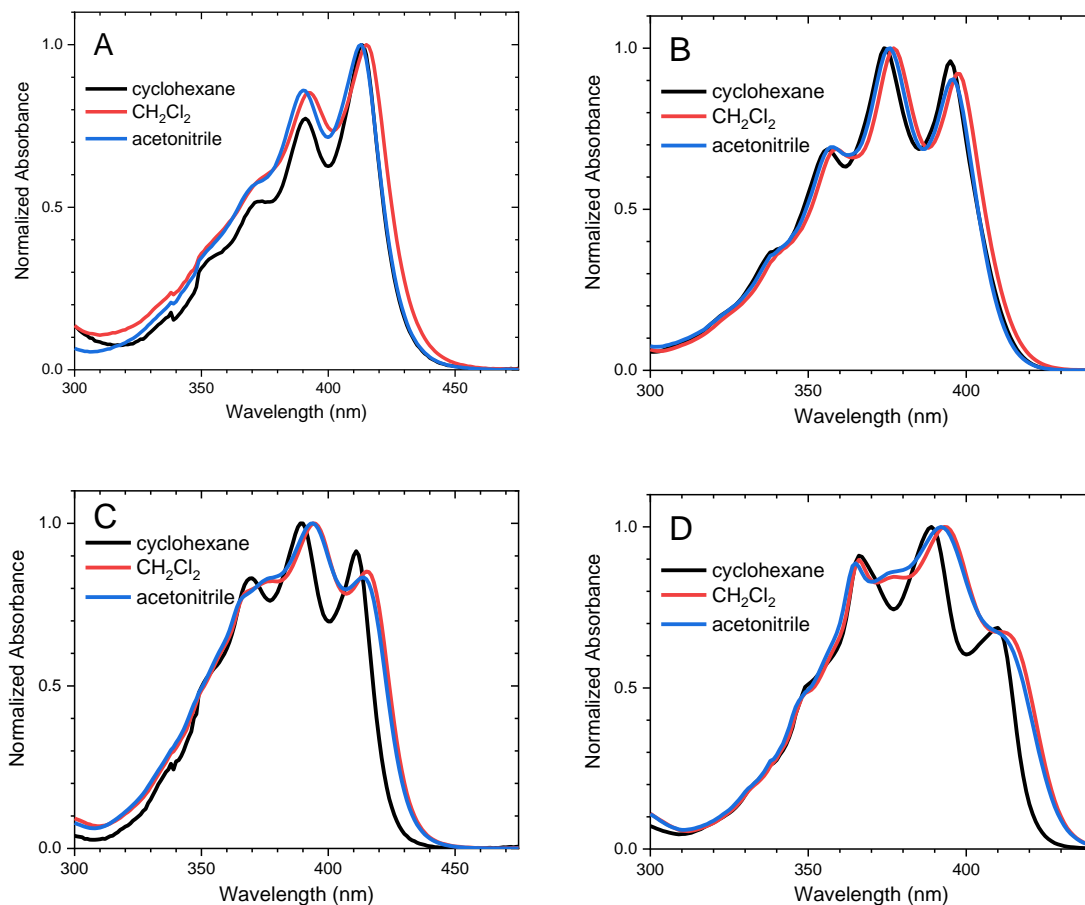

**Figure S4.** Normalized steady-state absorption of **An-S-An** (A), **An-S-Ph** (B), **An-SO<sub>2</sub>-An** (C), and **An-SO<sub>2</sub>-Ph** (D) in dilute solutions of cyclohexane (black), CH<sub>2</sub>Cl<sub>2</sub> (red), and acetonitrile (blue).

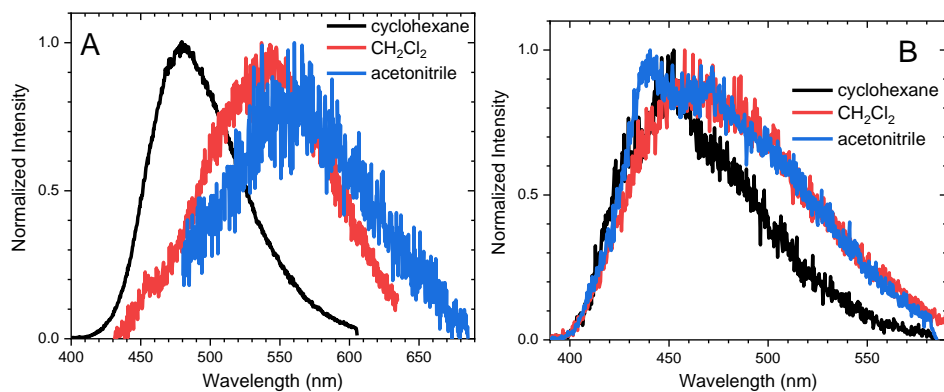

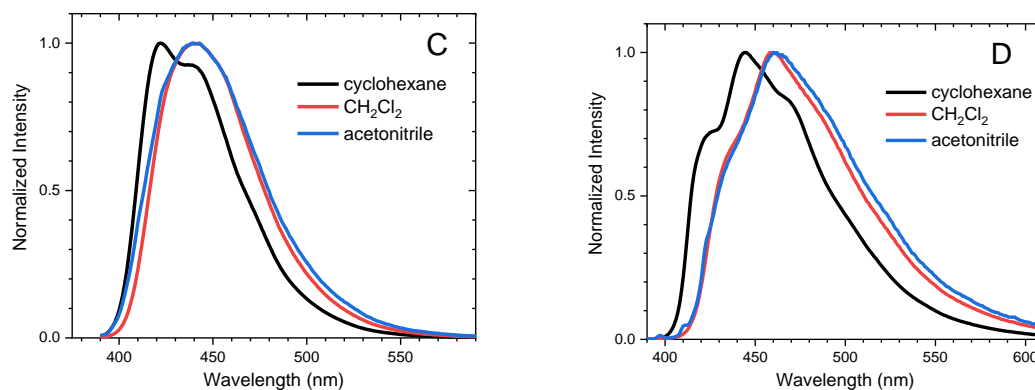

**Figure S5.** The normalized PL spectra of **An-S-An** (A) and **An-SO<sub>2</sub>-An** (B) in dilute solutions of cyclohexane (black), CH<sub>2</sub>Cl<sub>2</sub> (red), and acetonitrile (blue) showing the PL corresponding to the time traces shown in figures 2B and 5B, respectively. The steady-state PL spectra of **An-S-Ph** (C) and **An-SO<sub>2</sub>-Ph** (D).

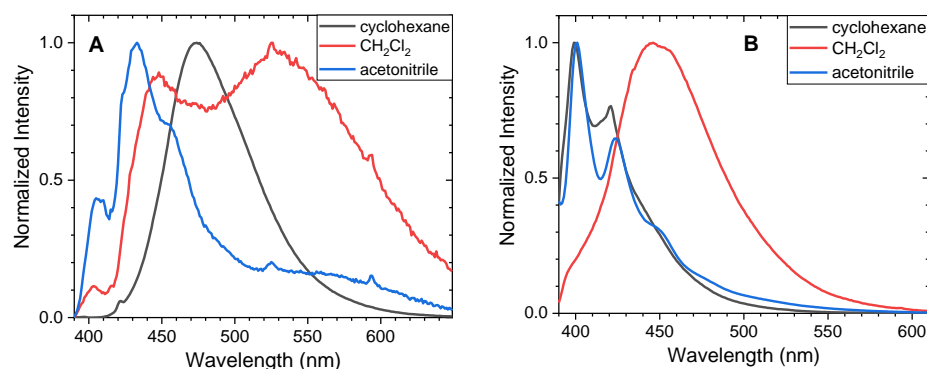

**Figure S6.** Steady-state emission spectra of **An-S-An** (A) and **An-SO<sub>2</sub>-An** (B) excited at 375 nm. Due to the inherent sensitivity of emission spectroscopy residual impurities can be identified in the emission spectra which are absent in the absorption spectra. The features between 390 – 420 nm overlap the absorption spectra of the dimers (Figure 1) indicating that the origin of these features is an impurity. The most likely culprit is an anthracene derivative used during the synthesis of the dimers. Using time-resolved emission spectroscopy, the impurity emission can be windowed out of the analysis.

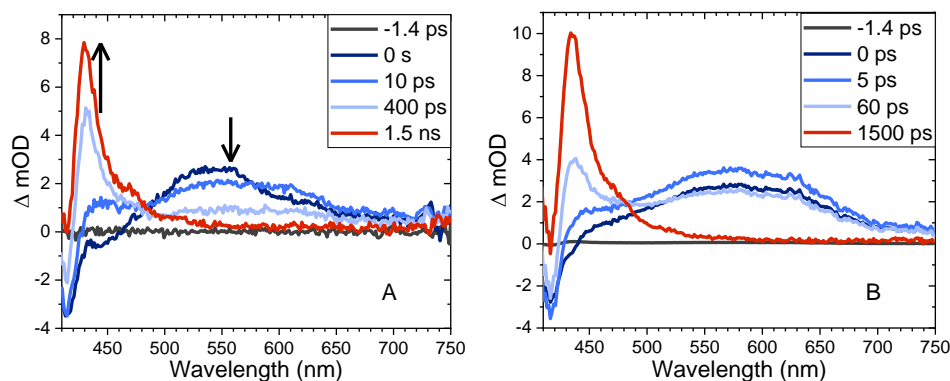

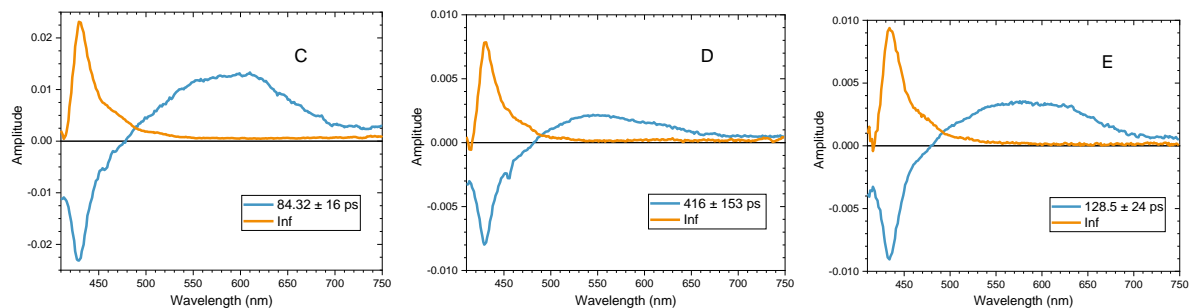

**Figure S7.** The transient absorption spectra of **An-S-An** in cyclohexane (A) and CH<sub>2</sub>Cl<sub>2</sub> (B). The corresponding species associated spectra obtained from a global analysis of the transient absorption data in acetonitrile (C), cyclohexane (D) and CH<sub>2</sub>Cl<sub>2</sub> (E).

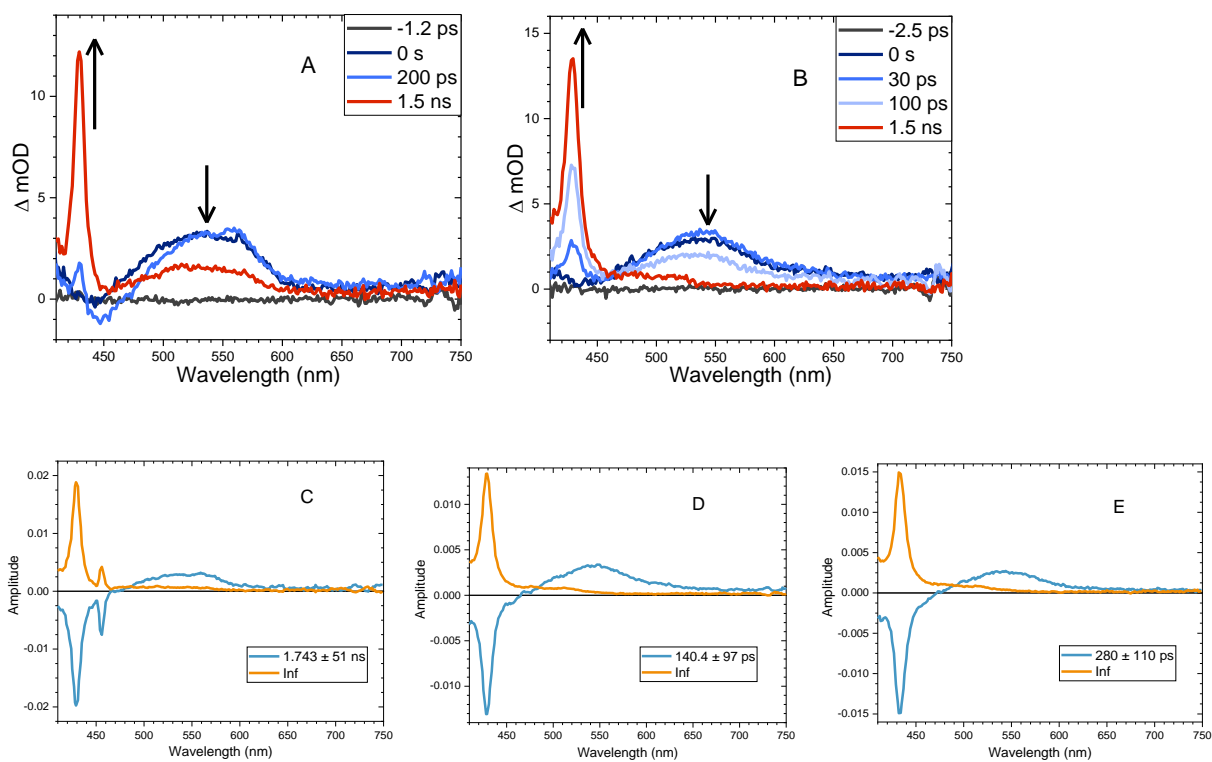

**Figure S8.** The transient absorption spectra of **An-S-Ph** in cyclohexane (A) and acetonitrile (B). The corresponding species associated spectra obtained from a global analysis of the transient absorption data in cyclohexane (C), acetonitrile (D) and CH<sub>2</sub>Cl<sub>2</sub> (E).

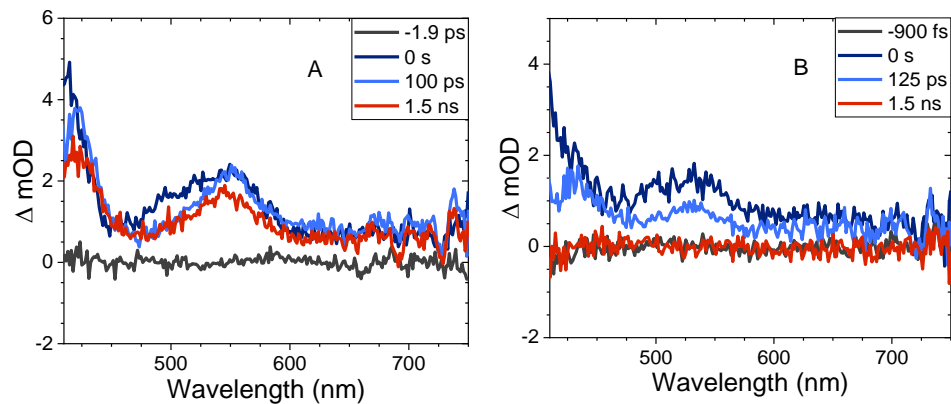

**Figure S9.** The transient absorption spectrum of **An-SO<sub>2</sub>-Ph** in cyclohexane (A) and CH<sub>2</sub>Cl<sub>2</sub> (B).

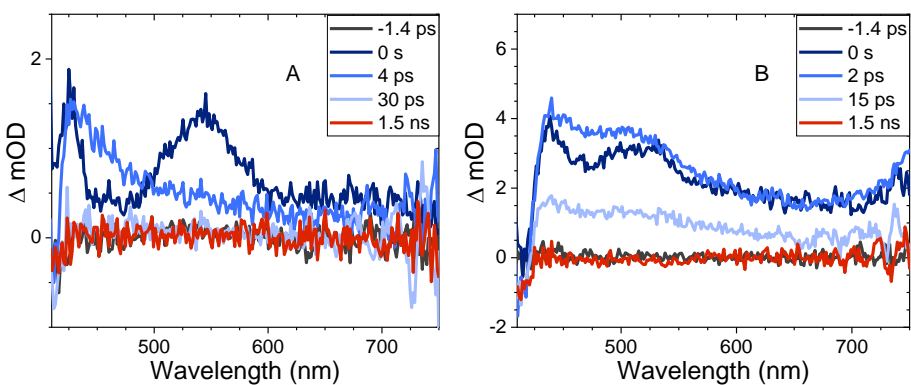

**Figure S10.** The transient absorption spectrum of **An-SO<sub>2</sub>-An** in cyclohexane (A) and acetonitrile (B).

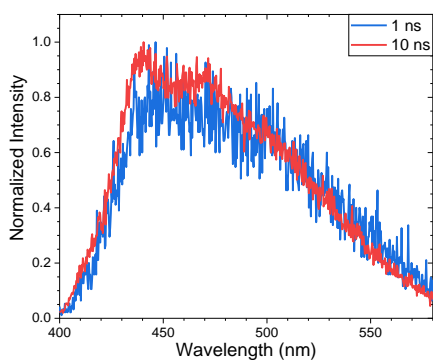

**Figure S11.** Time-resolved PL spectrum of **An-SO<sub>2</sub>-An** in acetonitrile showing the signal integrated over 1 ns and 10 ns.



## Computational Details

### Ground State Molecular structures

Ground state optimized geometries of S and SO<sub>2</sub> bridged anthracene dimers are very similar to each other, exhibiting C<sub>2</sub> symmetry with equivalent anthracene moieties in oblique disposition, C-S-C angle of ~104°, and a dihedral angle between anthracene molecular planes of ~45° (Figure S12). Dimers with a phenyl unit exhibit molecular geometries with larger dihedral angles between chromophoric planes, especially in **An-S-Ph** where the phenyl is oriented almost perpendicularly with respect to the **An** fragment. It is worth noting that SO<sub>2</sub>-bridged molecules present relatively short O···H distances, i.e. in the order of 2.1 Å, between the linker and anthracene protons fixing the relative orientation of the two chromophores.

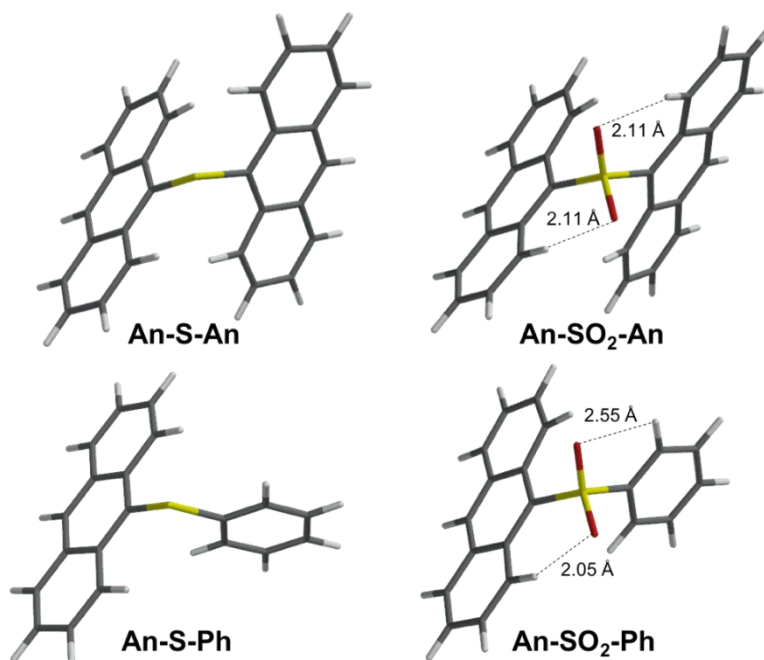

**Figure S12.** Ground state optimized geometries of **An-S-An**, **An-S-Ph**, **An-SO<sub>2</sub>-An** and **An-SO<sub>2</sub>-Ph** molecules.

**Table S1.** Decomposition (in %) of  $S_1$  of **An-S-An** and **An-SO<sub>2</sub>-An** dimers in terms of anthracene locally excited (LE), charge transfer between anthracene moieties (CT) and electron transfer from the bridge to the chromophores (CT<sub>B</sub>), and electronic couplings (in meV) between LE and CT and CT<sub>B</sub> diabatic contributions.

|                        | contributions / % |    |                 | couplings / meV |                    |
|------------------------|-------------------|----|-----------------|-----------------|--------------------|
|                        | LE                | CT | CT <sub>B</sub> | LE/CT           | LE/CT <sub>B</sub> |
| An-S-An                | 76                | 5  | 19              | 51              | 372                |
| An-SO <sub>2</sub> -An | 99                | 1  | -               | 40              | -                  |

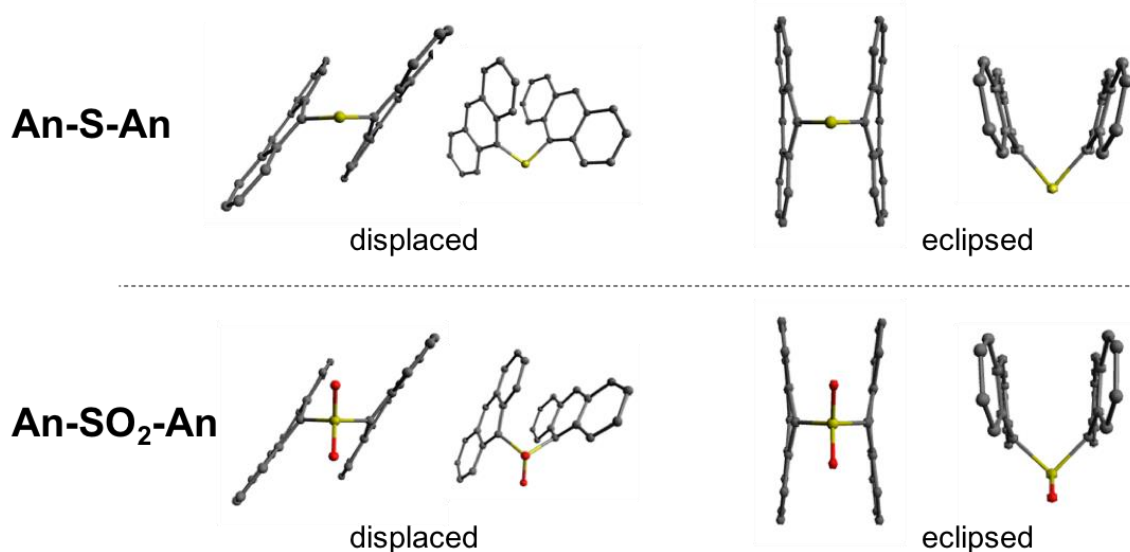

**Figure S13.** Excited state optimized geometries of displaced (left) and eclipsed (right) for **An-S-An**, (top) **An-SO<sub>2</sub>-An** (bottom) dimers.

*Structural comparison of An-SO<sub>2</sub>-An displaced and eclipsed forms to FC geometry*

Structural analysis (Table S2) clearly identifies the  $S_1$  displaced form as being structurally much closer to the ground state geometry than the  $S_1$  eclipsed minimum (Figure S13, left), while the  $S_1$  eclipsed minimum is rather close to the dimerization product (Figure S13, right).

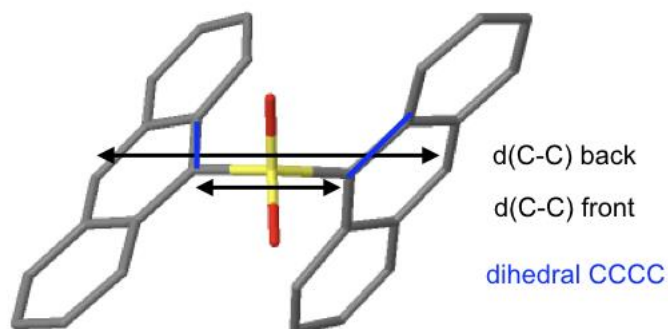

**Figure S14.** Structural parameters of **An-SO<sub>2</sub>-An** given in Table S2.

**Table S2.** Geometrical parameters (Figure S14) for ground state ( $S_0$ ),  $S_1$  displaced,  $S_1$  eclipsed and  $S_0$  dimer forms of **An-SO<sub>2</sub>-An**. Distances given in Å and angles in degrees.

| parameter     | $S_0$ | $S_1$ displaced | $S_1$ eclipsed | $S_0$ dimer |
|---------------|-------|-----------------|----------------|-------------|
| d(C-C) front  | 2.844 | 2.794           | 2.567          | 1.675       |
| d(C-C) back   | 6.645 | 5.226           | 3.289          | 1.609       |
| d(C-S)        | 1.812 | 1.790           | 1.774          | 1.764       |
| angle C-S-C   | 103.4 | 102.6           | 92.6           | 56.7        |
| dihedral CCCC | 53.1  | 54.7            | 0.0            | 0.0         |

**Table S3.** Computed deexcitation energies (in eV) from the displaced and eclipsed lowest excited singlet state ( $S_1 \rightarrow S_0$ ) and oscillator strengths computed in DCM solution.

| molecule               | conformer | character                   | $\Delta E$ | strength |
|------------------------|-----------|-----------------------------|------------|----------|
| An-S-An                | displaced | $\pi \rightarrow \pi^*$     | 2.57       | 0.09     |
|                        | eclipsed  | $\pi \rightarrow \pi^*$     | 2.07       | 0.12     |
|                        | elongated | $n(S) \rightarrow \sigma^*$ | 0.74       | 0.00     |
| An-SO <sub>2</sub> -An | displaced | $\pi \rightarrow \pi^*$     | 2.59       | 0.01     |
|                        | eclipsed  | $\pi \rightarrow \pi^*$     | 1.67       | 0.05     |
| An-S-Ph                | displaced | $\pi \rightarrow \pi^*$     | 3.07       | 0.32     |
| An-SO <sub>2</sub> -Ph | displaced | $\pi \rightarrow \pi^*$     | 3.02       | 0.25     |
|                        | eclipsed  | $\pi \rightarrow \pi^*$     | 2.88       | 0.22     |

The electronic structure of excimers in interacting chromophores is characterized by strong mixings of exciton and charge resonances, i.e. LE and CT.<sup>1</sup> Decomposition of the electronic transition to  $S_1$  in terms of diabatic state contributions (Table S4) confirms that the displaced and eclipsed relaxed forms can be indeed labeled as excimers. Eclipsed and displaced excimers are

built as even LE and CT contributions with no involvement of the linker, except for the displaced form of **An-S-An**, where the lone-pair electrons of the sulfide bridge play an important role.

**Table S4.** Decomposition (in %) of  $S_1$  of **An-S-An** and **An-SO<sub>2</sub>-An** dimers in terms of anthracene locally excited (LE), charge transfer between anthracene moieties (CT) and electron transfer from the bridge to the chromophores (CT<sub>B</sub>), and electronic couplings (in meV) between LE and CT and CT<sub>B</sub> diabatic contributions.

|                             | contributions / % |    |                 | couplings / meV |
|-----------------------------|-------------------|----|-----------------|-----------------|
|                             | LE                | CT | CT <sub>B</sub> | LE/CT           |
| <b>An-S-An</b>              |                   |    |                 |                 |
| displaced                   | 37                | 27 | 36              | 199             |
| eclipsed                    | 50                | 50 | 0               | 685             |
| <b>An-SO<sub>2</sub>-An</b> |                   |    |                 |                 |
| displaced                   | 46                | 54 | -               | 282             |
| eclipsed                    | 46                | 54 | -               | 808             |

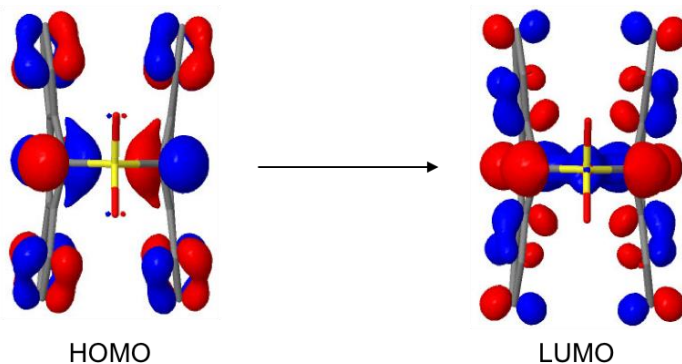

**Figure S15.** Frontier molecular orbitals of eclipsed excimer of **An-SO<sub>2</sub>-An** with bonding interactions between **An** in the LUMO.

#### *Spin-Orbit Coupling (SOC) and the El-Sayed's rule*

The relative magnitude of the SOC matrix element between  $S_1$  and  $T_1$  or  $T_2$  at the elongated forms (i.e.  $n(S) \rightarrow \sigma^*$ ) of the **An-S-An** and **An-S-Ph** dimers can be rationalized by El-Sayed's rule. The  $S_1$  and  $T_1$  states have  $n_{\perp}(S) \rightarrow \sigma^*$  character, where the  $n(S)$  orbital involved is perpendicular to the anthracene/phenyl plane, i.e. the one which can interact with the  $\pi$ -system. On the other hand, the  $T_2$  state has  $n_{\parallel}(S) \rightarrow \sigma^*$  character. Therefore, the largest SOC matrix elements are those between states where the  $n(S)$  orbital involved has different symmetry, i.e.  $S_1$  with  $T_2$ .

## Optimized Geometries

Ground state optimized coordinates for the An-S-An and An-SO<sub>2</sub>-An dimers (in Angstroms).

### An-S-An coordinates

|   |            |           |            |
|---|------------|-----------|------------|
| C | -18.343804 | 0.652497  | -7.639964  |
| C | -21.161848 | 0.512671  | -7.470502  |
| C | -18.149965 | -0.589900 | -8.282366  |
| C | -21.440678 | 1.213099  | -8.664481  |
| C | -18.953503 | -1.749572 | -8.028598  |
| C | -20.648344 | 2.305117  | -9.148897  |
| C | -18.747630 | -2.919414 | -8.703354  |
| C | -20.941453 | 2.928106  | -10.328861 |
| C | -17.721088 | -3.027711 | -9.686253  |
| C | -22.050465 | 2.512161  | -11.121743 |
| C | -16.909144 | -1.960440 | -9.935322  |
| C | -22.852306 | 1.499703  | -10.683253 |
| C | -17.084081 | -0.721103 | -9.237965  |
| C | -22.586581 | 0.831408  | -9.444118  |
| C | -16.220029 | 0.350284  | -9.463853  |
| C | -23.438308 | -0.170958 | -8.980086  |
| C | -16.363268 | 1.555988  | -8.778490  |
| C | -23.206336 | -0.816972 | -7.766553  |
| C | -15.450410 | 2.637560  | -9.002505  |
| C | -24.105442 | -1.826761 | -7.292085  |
| C | -15.597787 | 3.828114  | -8.353953  |
| C | -23.872773 | -2.480245 | -6.118016  |
| C | -16.679267 | 4.006947  | -7.442390  |
| C | -22.714966 | -2.161620 | -5.349553  |
| C | -17.569499 | 2.999210  | -7.201380  |
| C | -21.835045 | -1.204112 | -5.767927  |
| C | -17.449186 | 1.725447  | -7.851739  |
| C | -22.042720 | -0.482664 | -6.991171  |
| H | -19.725467 | -1.706680 | -7.271342  |
| H | -19.813090 | 2.659365  | -8.558844  |
| H | -19.368267 | -3.782969 | -8.481094  |
| H | -20.326591 | 3.758900  | -10.663611 |
| H | -17.580665 | -3.964083 | -10.218330 |
| H | -22.259905 | 3.014785  | -12.061500 |
| H | -16.105624 | -2.029966 | -10.664497 |
| H | -23.716233 | 1.182711  | -11.262324 |
| H | -15.411660 | 0.239610  | -10.183669 |
| H | -24.306990 | -0.448339 | -9.573610  |
| H | -14.635346 | 2.483349  | -9.705406  |
| H | -24.979856 | -2.059118 | -7.895057  |
| H | -14.900745 | 4.642355  | -8.529325  |
| H | -24.559841 | -3.244090 | -5.765754  |
| H | -16.796839 | 4.959966  | -6.934229  |
| H | -22.530125 | -2.690642 | -4.418817  |

|   |            |           |           |
|---|------------|-----------|-----------|
| H | -18.384777 | 3.163039  | -6.505246 |
| H | -20.960531 | -0.983062 | -5.165825 |
| S | -19.704571 | 0.896438  | -6.493869 |

**An-SO<sub>2</sub>-An** coordinates

|   |            |           |          |
|---|------------|-----------|----------|
| C | -41.050426 | 13.298058 | 4.810338 |
| C | -41.442549 | 14.186017 | 3.779419 |
| C | -41.047184 | 15.562489 | 3.686061 |
| C | -41.414546 | 16.335899 | 2.620806 |
| C | -42.214188 | 15.813036 | 1.565896 |
| C | -42.657008 | 14.525900 | 1.638762 |
| C | -42.302452 | 13.687321 | 2.743462 |
| C | -42.787830 | 12.383629 | 2.819871 |
| C | -42.503018 | 11.555238 | 3.902810 |
| C | -43.083481 | 10.248167 | 3.971334 |
| C | -42.829956 | 9.422302  | 5.025046 |
| C | -41.982876 | 9.874804  | 6.075194 |
| C | -41.397388 | 11.109811 | 6.042156 |
| C | -41.617765 | 12.008653 | 4.943953 |
| C | -38.426149 | 14.390086 | 4.726555 |
| C | -38.091136 | 13.483485 | 3.691718 |
| C | -38.489800 | 12.105597 | 3.645253 |
| C | -38.181582 | 11.313075 | 2.575301 |
| C | -37.442121 | 11.816570 | 1.468366 |
| C | -36.997285 | 13.104843 | 1.493178 |
| C | -37.291061 | 13.963414 | 2.600384 |
| C | -36.804479 | 15.268672 | 2.625433 |
| C | -37.030346 | 16.117089 | 3.706704 |
| C | -36.450229 | 17.426131 | 3.717689 |
| C | -36.647168 | 18.271894 | 4.767669 |
| C | -37.433494 | 17.838399 | 5.871676 |
| C | -38.016521 | 16.602047 | 5.895129 |
| C | -37.855063 | 15.682368 | 4.803938 |
| H | -40.488848 | 16.026578 | 4.487274 |
| H | -41.105640 | 17.376919 | 2.591157 |
| H | -42.485566 | 16.446914 | 0.727241 |
| H | -43.296291 | 14.109187 | 0.864746 |
| H | -43.424799 | 12.009145 | 2.021393 |
| H | -43.740225 | 9.938116  | 3.162576 |
| H | -43.276455 | 8.433888  | 5.076214 |
| H | -41.803444 | 9.228296  | 6.929629 |
| H | -40.772752 | 11.415855 | 6.867839 |
| H | -39.001975 | 11.655838 | 4.484542 |
| H | -38.490869 | 10.271758 | 2.581662 |
| H | -37.217000 | 11.167510 | 0.627651 |
| H | -36.402440 | 13.507513 | 0.677427 |
| H | -36.213829 | 15.628512 | 1.785702 |
| H | -35.840176 | 17.721422 | 2.867857 |

|   |            |           |          |
|---|------------|-----------|----------|
| H | -36.201247 | 19.261845 | 4.774889 |
| H | -37.567049 | 18.501095 | 6.722118 |
| H | -38.593265 | 16.311056 | 6.760123 |
| O | -39.136505 | 12.736309 | 6.655308 |
| O | -40.232062 | 14.982894 | 6.668593 |
| S | -39.706306 | 13.853454 | 5.891128 |

**Excited state ( $S_1$ ) optimized coordinates for the An-S-An and An-SO<sub>2</sub>-An dimers (in Angstroms).**

**An-S-An *displaced* coordinates**

|   |            |           |            |
|---|------------|-----------|------------|
| C | -18.369787 | 0.667752  | -7.331298  |
| C | -21.094235 | 0.653353  | -7.187570  |
| C | -18.505837 | -0.411067 | -8.275382  |
| C | -21.077091 | 1.061500  | -8.568463  |
| C | -19.225940 | -1.592213 | -7.993365  |
| C | -20.365164 | 2.191112  | -9.026802  |
| C | -19.466754 | -2.541247 | -8.969430  |
| C | -20.242026 | 2.468411  | -10.375621 |
| C | -18.953489 | -2.366865 | -10.273377 |
| C | -20.871494 | 1.642103  | -11.332237 |
| C | -18.183537 | -1.265259 | -10.563258 |
| C | -21.636625 | 0.577499  | -10.918123 |
| C | -17.914206 | -0.272678 | -9.574117  |
| C | -21.785577 | 0.271029  | -9.532388  |
| C | -17.094829 | 0.826384  | -9.847464  |
| C | -22.599212 | -0.780529 | -9.100944  |
| C | -16.775347 | 1.778439  | -8.854843  |
| C | -22.797796 | -1.050067 | -7.729160  |
| C | -15.864889 | 2.835666  | -9.121496  |
| C | -23.702739 | -2.059728 | -7.305627  |
| C | -15.583067 | 3.790456  | -8.169529  |
| C | -23.867733 | -2.353914 | -5.970104  |
| C | -16.216402 | 3.732677  | -6.910837  |
| C | -23.118355 | -1.655081 | -5.001151  |
| C | -17.118902 | 2.725308  | -6.628947  |
| C | -22.218622 | -0.679285 | -5.384670  |
| C | -17.415101 | 1.715466  | -7.574803  |
| C | -22.040197 | -0.335688 | -6.745616  |
| H | -19.620494 | -1.749470 | -6.993910  |
| H | -19.882404 | 2.844663  | -8.306299  |
| H | -20.039331 | -3.431163 | -8.725041  |
| H | -19.672139 | 3.335323  | -10.696870 |
| H | -19.153747 | -3.110663 | -11.039280 |
| H | -20.763520 | 1.858490  | -12.391228 |
| H | -17.756219 | -1.135546 | -11.554799 |
| H | -22.152329 | -0.047323 | -11.643536 |
| H | -16.652832 | 0.928055  | -10.836669 |

|   |            |           |            |
|---|------------|-----------|------------|
| H | -23.130928 | -1.379235 | -9.837855  |
| H | -15.396767 | 2.881079  | -10.102048 |
| H | -24.261492 | -2.605187 | -8.062548  |
| H | -14.881749 | 4.590534  | -8.388432  |
| H | -24.566485 | -3.126639 | -5.662665  |
| H | -15.998130 | 4.485863  | -6.159243  |
| H | -23.244763 | -1.886818 | -3.947513  |
| H | -17.604434 | 2.707458  | -5.656959  |
| H | -21.642833 | -0.161831 | -4.622066  |
| S | -19.677508 | 0.967285  | -6.194140  |

**An-SO<sub>2</sub>-An displaced** coordinates

|   |            |           |            |
|---|------------|-----------|------------|
| C | -18.330450 | 0.651634  | -7.236681  |
| C | -21.120527 | 0.717332  | -7.112975  |
| C | -18.535096 | -0.456439 | -8.138496  |
| C | -21.033569 | 1.170402  | -8.480464  |
| C | -19.214670 | -1.638712 | -7.785484  |
| C | -20.351580 | 2.337250  | -8.877611  |
| C | -19.568309 | -2.578366 | -8.744805  |
| C | -20.115371 | 2.610723  | -10.218447 |
| C | -19.206284 | -2.407553 | -10.093597 |
| C | -20.603797 | 1.760843  | -11.227877 |
| C | -18.486190 | -1.295664 | -10.463638 |
| C | -21.330491 | 0.646687  | -10.878831 |
| C | -18.118485 | -0.305312 | -9.506851  |
| C | -21.578780 | 0.328660  | -9.511677  |
| C | -17.396432 | 0.823360  | -9.895166  |
| C | -22.307386 | -0.810276 | -9.169275  |
| C | -16.981640 | 1.793698  | -8.957221  |
| C | -22.601856 | -1.122164 | -7.824230  |
| C | -16.137366 | 2.859805  | -9.345265  |
| C | -23.452601 | -2.205364 | -7.503313  |
| C | -15.728986 | 3.809697  | -8.430725  |
| C | -23.744020 | -2.512887 | -6.189687  |
| C | -16.146149 | 3.715205  | -7.089239  |
| C | -23.198731 | -1.734429 | -5.150770  |
| C | -16.985097 | 2.694569  | -6.685170  |
| C | -22.350715 | -0.681119 | -5.433413  |
| C | -17.450196 | 1.716043  | -7.603795  |
| C | -22.004029 | -0.352912 | -6.771457  |
| H | -19.498650 | -1.805344 | -6.751606  |
| H | -19.971256 | 3.018897  | -8.123923  |
| H | -20.116767 | -3.464700 | -8.439798  |
| H | -19.560748 | 3.505345  | -10.485752 |
| H | -19.492052 | -3.149938 | -10.832400 |
| H | -20.409049 | 1.987096  | -12.271695 |
| H | -18.182501 | -1.150656 | -11.497213 |
| H | -21.730626 | -0.015791 | -11.642094 |



|   |            |           |            |
|---|------------|-----------|------------|
| H | -17.096723 | 0.932272  | -10.934959 |
| H | -22.705224 | -1.445374 | -9.957488  |
| H | -15.812304 | 2.916959  | -10.381112 |
| H | -23.876900 | -2.792812 | -8.313719  |
| H | -15.075629 | 4.619762  | -8.741252  |
| H | -24.403780 | -3.343831 | -5.957878  |
| H | -15.797732 | 4.442263  | -6.361826  |
| H | -23.454409 | -1.954387 | -4.118597  |
| H | -17.271311 | 2.623605  | -5.644021  |
| H | -21.963860 | -0.078371 | -4.622243  |
| S | -19.670211 | 0.994815  | -6.100404  |
| O | -19.609922 | 2.414610  | -5.711801  |
| O | -19.655148 | 0.001268  | -5.012642  |

**An-S-An eclipsed** coordinates

|   |            |            |           |
|---|------------|------------|-----------|
| C | -27.008767 | -22.083423 | 3.768696  |
| C | -27.107620 | -20.782915 | 3.171111  |
| C | -26.986963 | -19.584612 | 3.901371  |
| C | -26.993890 | -18.350371 | 3.267983  |
| C | -27.096097 | -18.273273 | 1.868122  |
| C | -27.230277 | -19.427636 | 1.122273  |
| C | -27.269278 | -20.702684 | 1.746766  |
| C | -27.445311 | -21.880817 | 1.000747  |
| C | -27.619026 | -23.128400 | 1.624384  |
| C | -27.932416 | -24.294549 | 0.876618  |
| C | -28.139570 | -25.507714 | 1.502870  |
| C | -28.038927 | -25.601213 | 2.901870  |
| C | -27.693180 | -24.487825 | 3.653780  |
| C | -27.461373 | -23.237923 | 3.047219  |
| C | -24.704955 | -22.428548 | 4.056091  |
| C | -24.446644 | -23.689287 | 3.422001  |
| C | -24.738893 | -24.930528 | 4.020146  |
| C | -24.561265 | -26.122031 | 3.332211  |
| C | -24.106532 | -26.110986 | 2.002106  |
| C | -23.796936 | -24.912714 | 1.389591  |
| C | -23.928180 | -23.680285 | 2.083176  |
| C | -23.578353 | -22.458614 | 1.482545  |
| C | -23.579037 | -21.254575 | 2.207697  |
| C | -23.096536 | -20.045655 | 1.639441  |
| C | -23.065182 | -18.876516 | 2.373607  |
| C | -23.517577 | -18.871507 | 3.704574  |
| C | -24.033184 | -20.027718 | 4.271952  |
| C | -24.093438 | -21.234425 | 3.548037  |
| H | -26.887585 | -19.633963 | 4.980781  |
| H | -26.904121 | -17.442624 | 3.857449  |
| H | -27.075748 | -17.305889 | 1.374337  |
| H | -27.320656 | -19.375951 | 0.039772  |
| H | -27.529327 | -21.814172 | -0.082376 |

|   |            |            |           |
|---|------------|------------|-----------|
| H | -28.018683 | -24.211475 | -0.204253 |
| H | -28.386084 | -26.387870 | 0.915804  |
| H | -28.216494 | -26.551137 | 3.397512  |
| H | -27.598658 | -24.575589 | 4.731176  |
| H | -25.109505 | -24.949188 | 5.039798  |
| H | -24.790361 | -27.064597 | 3.820719  |
| H | -23.992952 | -27.044872 | 1.458971  |
| H | -23.434316 | -24.896270 | 0.364461  |
| H | -23.221775 | -22.457211 | 0.454169  |
| H | -22.738538 | -20.060416 | 0.612656  |
| H | -22.685652 | -17.962654 | 1.925396  |
| H | -23.479318 | -17.956537 | 4.288462  |
| H | -24.398588 | -20.007905 | 5.293518  |
| S | -26.030573 | -22.299306 | 5.252771  |

**An-SO<sub>2</sub>-An eclipsed** coordinates

|   |            |           |          |
|---|------------|-----------|----------|
| C | -41.005675 | 13.793334 | 5.206778 |
| C | -41.358185 | 15.017098 | 4.528424 |
| C | -41.502490 | 16.264655 | 5.171933 |
| C | -41.759665 | 17.419089 | 4.449165 |
| C | -41.872117 | 17.379307 | 3.049269 |
| C | -41.759469 | 16.173007 | 2.390091 |
| C | -41.532562 | 14.969710 | 3.105203 |
| C | -41.455508 | 13.738194 | 2.433663 |
| C | -41.415938 | 12.521452 | 3.135001 |
| C | -41.527710 | 11.285156 | 2.449650 |
| C | -41.526226 | 10.089974 | 3.138151 |
| C | -41.410290 | 10.094920 | 4.538336 |
| C | -41.263338 | 11.285654 | 5.232417 |
| C | -41.238640 | 12.525287 | 4.558624 |
| C | -38.442900 | 13.915819 | 5.126761 |
| C | -38.131034 | 12.673624 | 4.462081 |
| C | -37.942220 | 11.445156 | 5.130185 |
| C | -37.727495 | 10.271105 | 4.425333 |
| C | -37.704403 | 10.271473 | 3.020551 |
| C | -37.863317 | 11.458372 | 2.336040 |
| C | -38.047784 | 12.681119 | 3.029915 |
| C | -38.171341 | 13.893340 | 2.330391 |
| C | -38.165250 | 15.129243 | 2.998699 |
| C | -38.097053 | 16.345985 | 2.273826 |
| C | -38.054551 | 17.559741 | 2.927747 |
| C | -38.083156 | 17.593720 | 4.331973 |
| C | -38.186519 | 16.422839 | 5.066558 |
| C | -38.252379 | 15.165097 | 4.430240 |
| H | -41.413110 | 16.319081 | 6.248748 |
| H | -41.871042 | 18.362865 | 4.974871 |
| H | -42.053819 | 18.292570 | 2.490429 |
| H | -41.855444 | 16.123801 | 1.308268 |

|   |            |           |          |
|---|------------|-----------|----------|
| H | -41.542448 | 13.720884 | 1.349297 |
| H | -41.627637 | 11.298734 | 1.367148 |
| H | -41.620921 | 9.150354  | 2.601969 |
| H | -41.431723 | 9.157845  | 5.086927 |
| H | -41.168841 | 11.266338 | 6.309978 |
| H | -37.962288 | 11.421273 | 6.211620 |
| H | -37.579571 | 9.342768  | 4.969229 |
| H | -37.555262 | 9.343038  | 2.477300 |
| H | -37.836586 | 11.476917 | 1.249338 |
| H | -38.154850 | 13.880217 | 1.242610 |
| H | -38.065567 | 16.302334 | 1.187961 |
| H | -37.993367 | 18.484014 | 2.360885 |
| H | -38.027828 | 18.545570 | 4.852007 |
| H | -38.214324 | 16.472094 | 6.147020 |
| O | -39.603042 | 12.638655 | 7.182376 |
| O | -39.722484 | 15.125006 | 7.152395 |
| S | -39.686477 | 13.871270 | 6.391785 |

**Optimized MECP coordinates for the An-S-An dimer (in Angstroms).**

**An-S-An *elongated* coordinates**

|   |           |           |           |
|---|-----------|-----------|-----------|
| C | -5.001778 | -0.098991 | 0.846047  |
| C | -4.199171 | 0.956670  | 0.328002  |
| C | -4.787420 | 2.104849  | -0.195271 |
| C | -2.771902 | 0.828498  | 0.348168  |
| C | -4.020571 | 3.147235  | -0.708460 |
| C | -2.590492 | 3.052427  | -0.706689 |
| C | -1.988241 | 1.887481  | -0.171938 |
| C | 4.765917  | 1.296822  | -0.085047 |
| C | 4.725951  | 0.895838  | 2.341270  |
| C | 4.062318  | 1.165940  | 1.106207  |
| C | 4.028977  | 0.774538  | 3.499312  |
| C | 2.626104  | 1.306212  | 1.110544  |
| C | 4.130524  | 1.563820  | -1.291781 |
| C | 2.051064  | 1.571349  | -0.116891 |
| C | 1.934431  | 1.171589  | 2.352431  |
| C | 2.695341  | 1.713368  | -1.330112 |
| C | 2.613135  | 0.915618  | 3.500400  |
| H | 2.073758  | 0.818401  | 4.428736  |
| H | 0.864247  | 1.281349  | 2.352191  |
| S | -0.187946 | 1.749660  | -0.147897 |
| C | -2.223673 | -0.364313 | 0.890265  |
| C | -4.435153 | -1.225697 | 1.358456  |
| H | -2.579638 | -2.250261 | 1.781772  |
| C | -3.025325 | -1.355271 | 1.378236  |
| H | -1.154469 | -0.476076 | 0.907366  |
| H | 5.839338  | 1.186116  | -0.072880 |

|   |           |           |           |
|---|-----------|-----------|-----------|
| H | 4.542674  | 0.572925  | 4.425216  |
| H | 5.799941  | 0.792516  | 2.326807  |
| H | -5.863332 | 2.188900  | -0.203521 |
| H | -6.074278 | 0.017118  | 0.820789  |
| H | -5.051391 | -2.020305 | 1.747169  |
| C | 4.230763  | 1.943255  | -3.684728 |
| C | 4.862747  | 1.690774  | -2.510725 |
| C | 2.815759  | 2.088442  | -3.719045 |
| C | 2.073100  | 1.977674  | -2.587237 |
| H | 4.795421  | 2.034635  | -4.598364 |
| H | 2.328096  | 2.287735  | -4.659672 |
| H | 1.002859  | 2.083798  | -2.611796 |
| H | 5.935204  | 1.577484  | -2.471505 |
| C | -2.487282 | 5.245794  | -1.742524 |
| H | -1.902172 | 6.059425  | -2.140280 |
| C | -1.856189 | 4.144221  | -1.241577 |
| C | -3.900229 | 5.337067  | -1.742463 |
| H | -4.379825 | 6.217082  | -2.139574 |
| C | -4.642131 | 4.313207  | -1.238227 |
| H | -0.782438 | 4.088954  | -1.242628 |
| H | -5.719766 | 4.365458  | -1.228041 |

## References

1. J. B. Birks, Excimers, *Rep. Prog. Phys.*, 1975, **38**, 903.
